# Supplementary material for: Semiconductors with a chiral crystal structure in group IVB transition metal pernitrides
Source: Royal Society of Chemistry journal article supplement (doi:10.1039/d2cp02627a), 2022-01-01
Supplement: d2cp02627a1.pdf [file d2cp02627a1.pdf]

## **Semiconductors with Chiral Crystal Structure in Group**

### **IVB Transition Metal Pernitrides**

Xing Xie<sup>a</sup>, Minru Wen<sup>a,\*</sup>, Huafeng Dong<sup>a</sup>, Hui Long<sup>a</sup>, Xin Zhang<sup>a</sup>, Fugen Wu<sup>b</sup> and  
Zhongfei Mu<sup>c</sup>

<sup>a</sup>School of Physics and Optoelectronic Engineering, Guangdong University of Technology, Guangzhou 510006, China

<sup>b</sup>School of Materials and Energy, Guangdong University of Technology, Guangzhou 510006, China

<sup>c</sup>Experimental Teaching Department, Guangdong University of Technology, Guangzhou, 510006, China

\*E-mail: [mrwen@gdut.edu.cn](mailto:mrwen@gdut.edu.cn)

Table S1. The bond lengths ( $\text{\AA}$ ) of N-N ( $d_{\text{N-N}}$ ) and TM-N bond, volume ( $\text{\AA}^3$ ) and band gap (eV) calculated by PBE and HSE06 at ambient pressure for  $P3_121$ -TMN<sub>2</sub>.  $d1-d4$  denote four type TM-N bonds marked in Figure 1 (c).

|                  | $d_{\text{N-N}}$ | $d1$  | $d2$  | $d3$  | $d4$  | volume | Band Gap |       |
|------------------|------------------|-------|-------|-------|-------|--------|----------|-------|
|                  |                  |       |       |       |       |        | PBE      | HSE06 |
| TiN <sub>2</sub> | 1.385            | 2.076 | 2.145 | 2.275 | 2.403 | 76.42  | 0.413    | 1.076 |
| ZrN <sub>2</sub> | 1.440            | 2.229 | 2.308 | 2.418 | 2.524 | 91.86  | 0.703    | 1.341 |
| HfN <sub>2</sub> | 1.467            | 2.199 | 2.273 | 2.385 | 2.504 | 89.27  | 1.089    | 1.838 |

Table S2. Calculated lattice constants and Wyckoff Position for TiN<sub>2</sub> at 0 GPa.

| Phase    | lattice constants ( $\text{\AA}$ )                                | Wyckoff Position |          |        |        |        |
|----------|-------------------------------------------------------------------|------------------|----------|--------|--------|--------|
|          |                                                                   | atom             | position | x      | y      | z      |
| $P3_121$ | $a=b=4.147, c=5.130$<br>$\alpha=\beta=90^\circ, \gamma=120^\circ$ | Ti               | 3a       | 0.0000 | 0.6450 | 0.6667 |
|          |                                                                   | N                | 6c       | 0.1602 | 0.8002 | 0.0915 |
| $P3_221$ | $a=b=4.147, c=5.130$<br>$\alpha=\beta=90^\circ, \gamma=120^\circ$ | Ti               | 3a       | 0.6451 | 0.0000 | 0.6667 |
|          |                                                                   | N                | 6c       | 0.3601 | 0.2000 | 0.4249 |

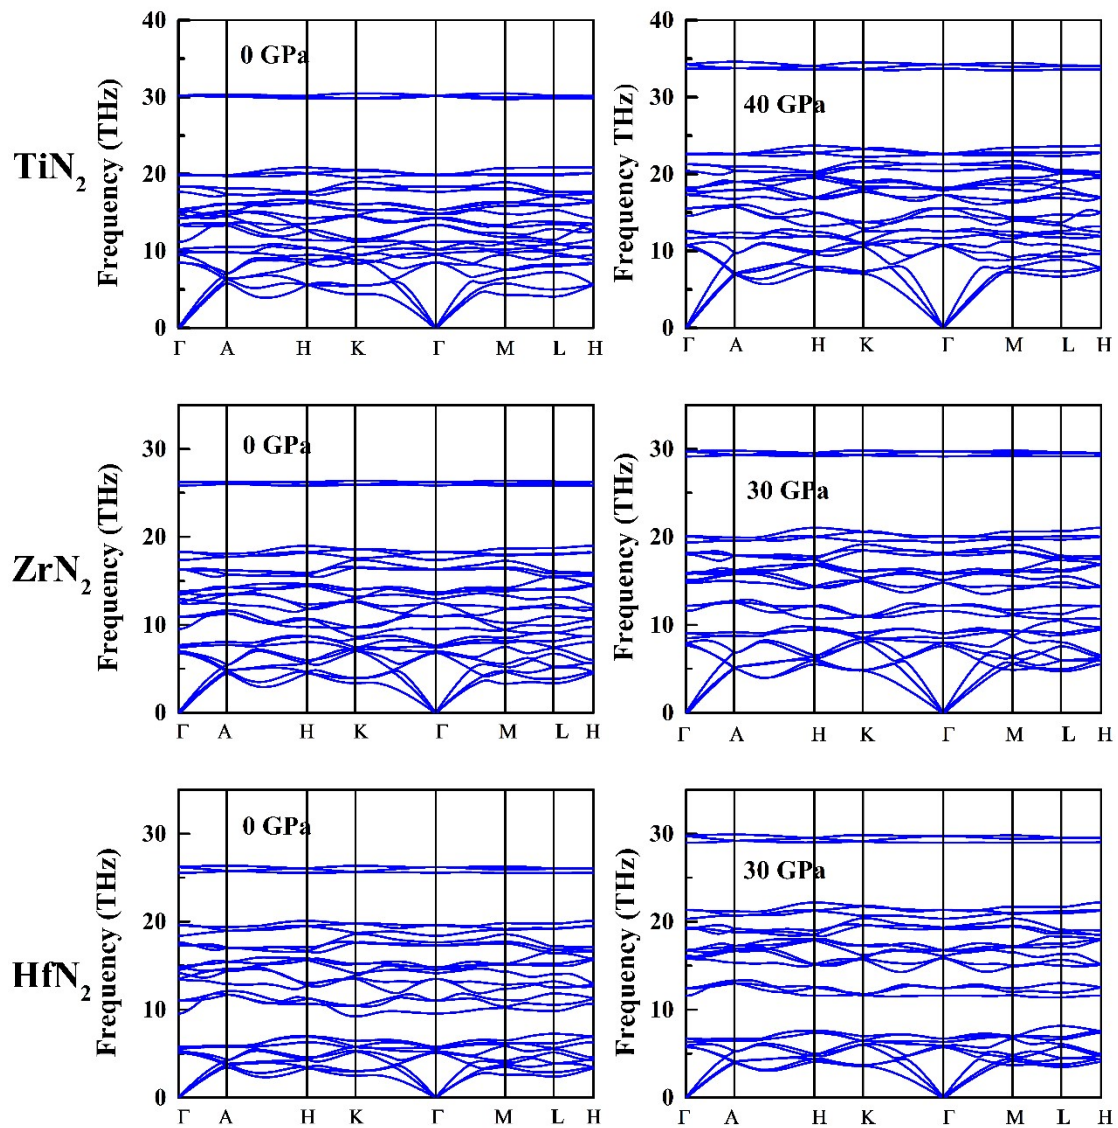

Figure S1. Phonon spectrum of  $P3_121$ - $\text{TMN}_2$  at 0 GPa and high pressure.

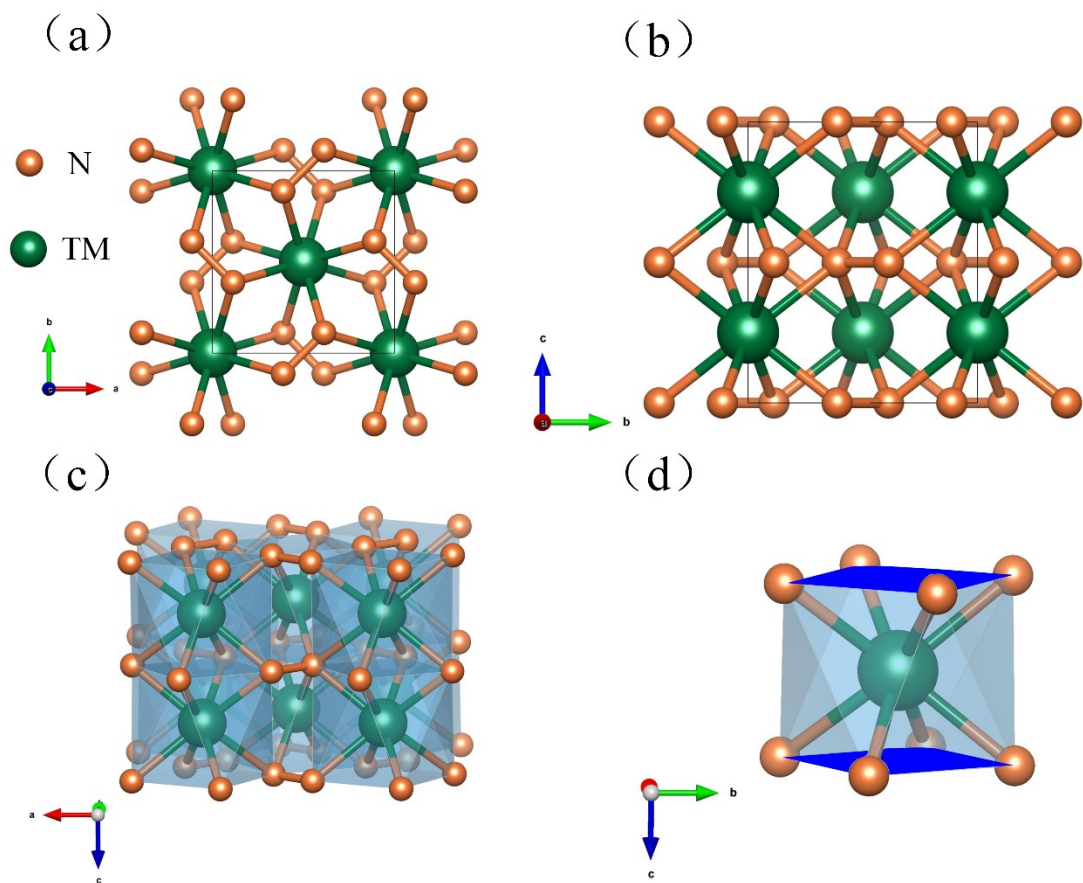

Figure S2. Crystal structure of  $I4/mcm$ - $\text{TMN}_2$  for view of (a)  $[001]$  and (b)  $[100]$  direction. (c) conventional unit cell with decanedrons and (d) diagram of a single decanedron. The blue planes denote the N atom layers. The up plane of decanedron is parallel to the bottom plane, and the rotation angle from up N layer to bottom N layer are  $32.23^\circ$  (anticlockwise) or  $57.77^\circ$  (clockwise).

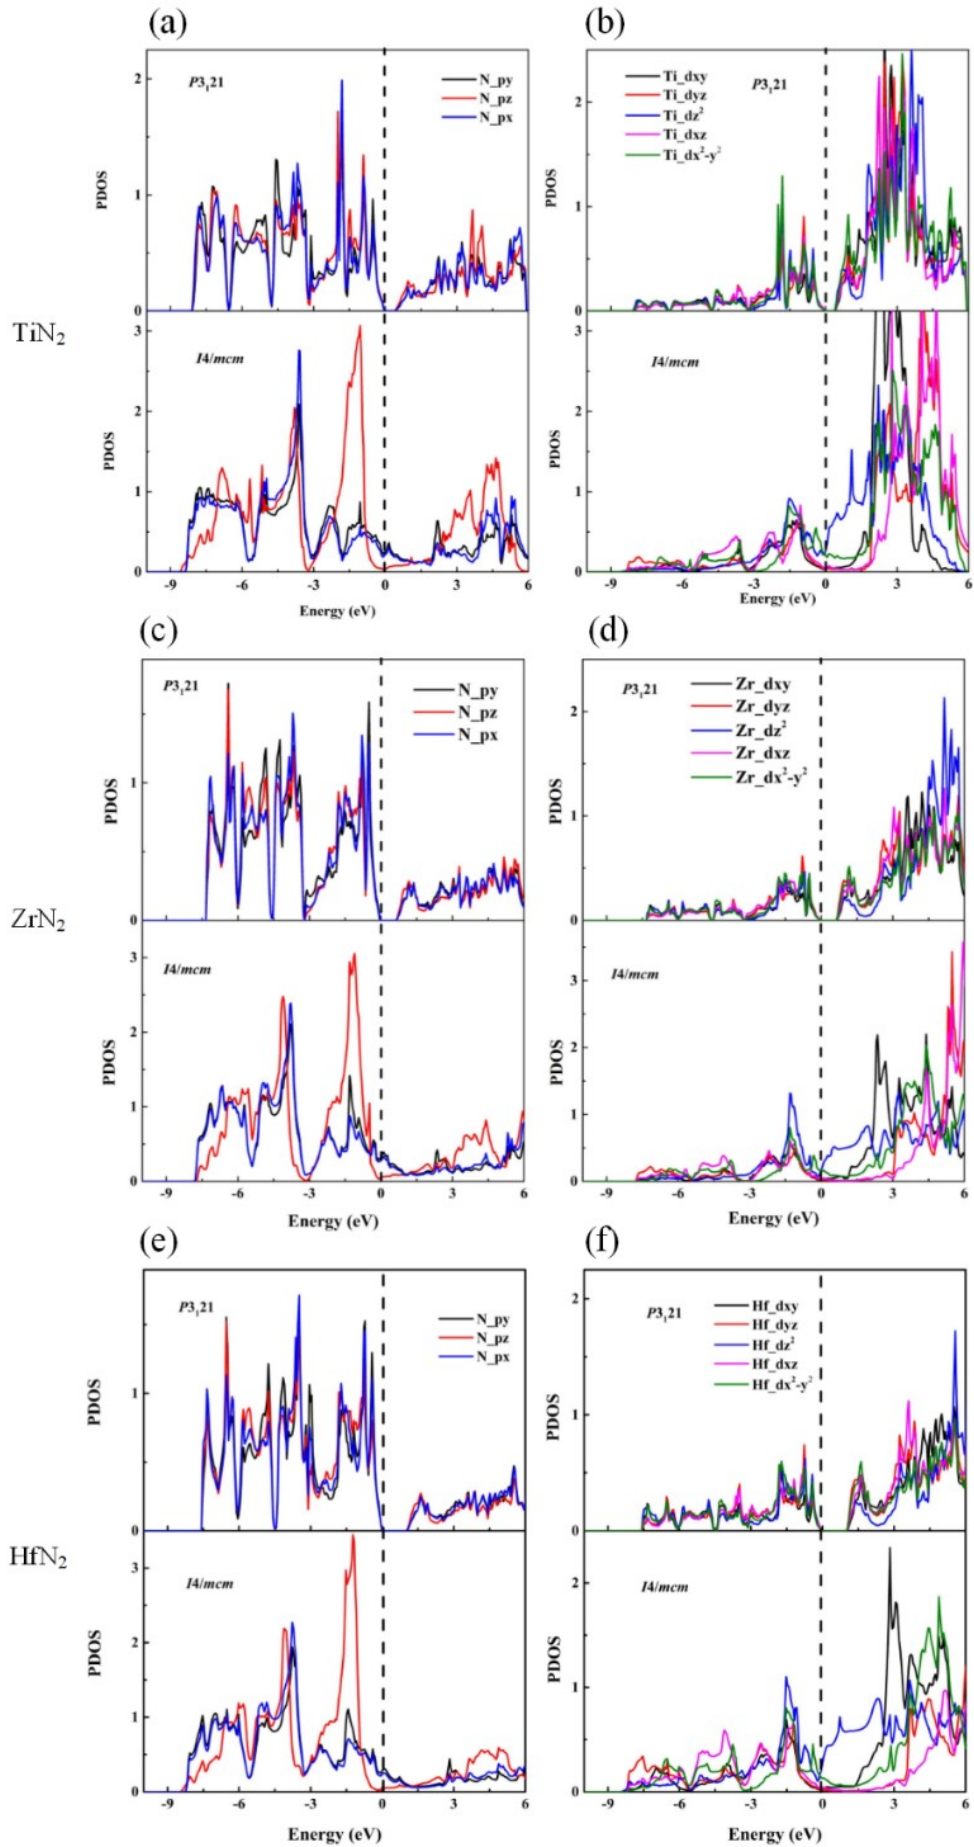

Figure S3. Projected density of state (PDOS) of N<sub>2</sub>p and TM<sub>d</sub> orbitals of *P3<sub>1</sub>21* (up panel) and *I4/mcm* (bottom panel) phases for (a) and (b) TiN<sub>2</sub>, (c) and (d) ZrN<sub>2</sub>, and (e) and (f) HfN<sub>2</sub>, respectively. The partial orbital of N<sub>p</sub> (N<sub>py</sub>, N<sub>pz</sub>, and N<sub>px</sub>) and TM<sub>d</sub> (TM<sub>dxy</sub>, TM<sub>dyz</sub>, TM<sub>dz<sup>2</sup></sub>, TM<sub>dxz</sub>, and dx<sup>2</sup>-y<sup>2</sup>) of *P3<sub>1</sub>21* phase show nearly evenly contribution in the -8-6 eV energy ranges, respectively. However, in *I4/mcm* phase, the orbital contribution of N<sub>pz</sub> are not the same as that of N<sub>py</sub> and N<sub>px</sub>, and the projected orbital of TM<sub>d</sub> show different contribution, such as the mainly contribution of dz<sup>2</sup> for 0-2 eV. It is indicated that there is significant difference between *P3<sub>1</sub>21* and *I4/mcm* structures on the contribution of partial orbitals of N<sub>2</sub>p and TM<sub>d</sub> orbitals.

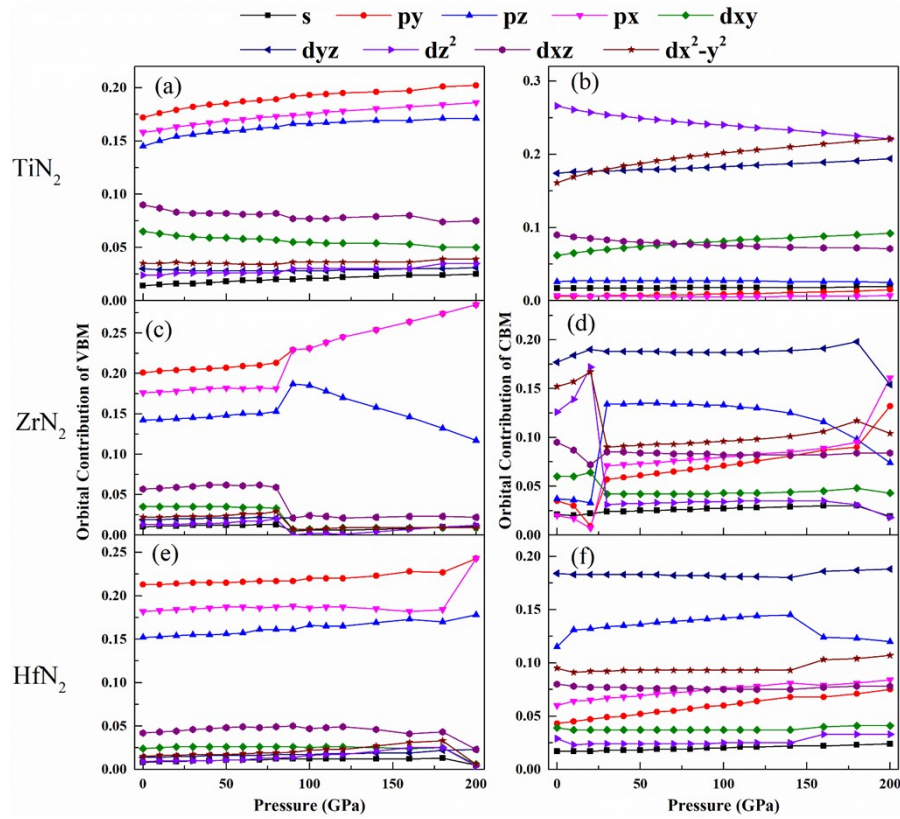

Figure S4. Projected orbital contribution of VBM and CBM as a function of pressure in *P3<sub>1</sub>21* phase.

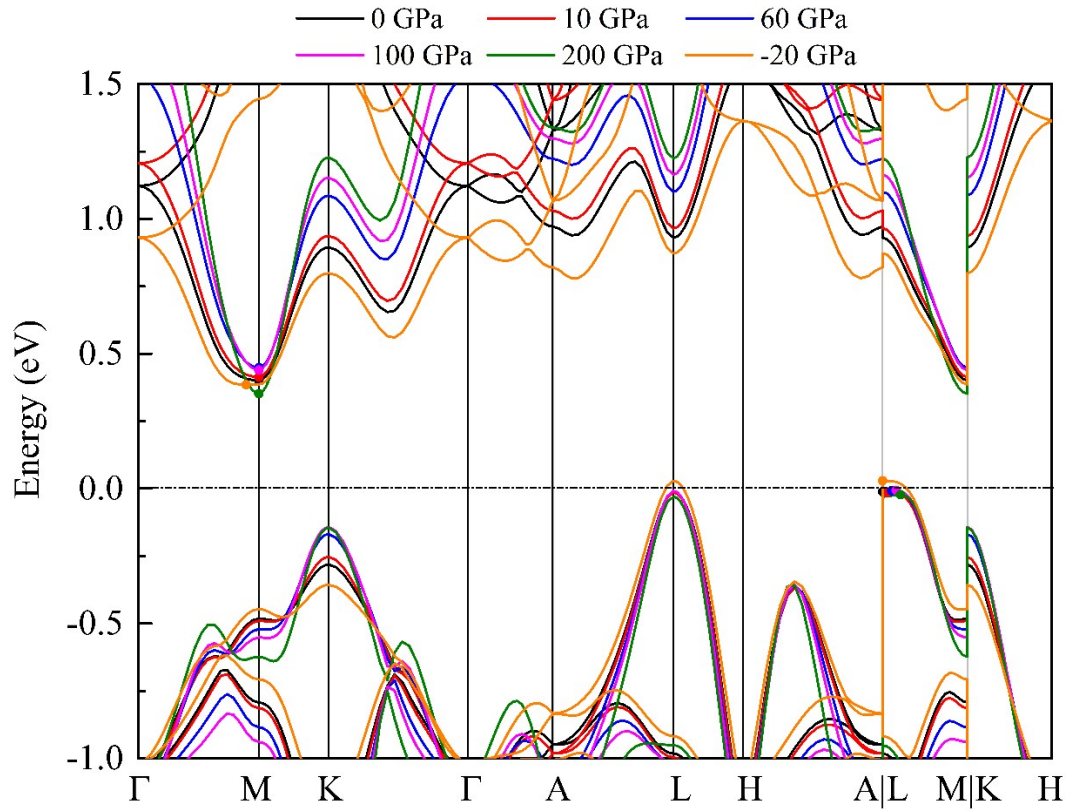

Figure S5. Band structure of  $P3_121$ - $\text{TiN}_2$  at ambient and high pressure. The CBM is at M point in the pressure range 0-200 GPa, while the CBM is on the line between  $\Gamma$  and M at -20 GPa (the negative sign represents the applied hydrostatic expansion pressure). The VBM at 0 and -20 GPa is at L point, and with the pressure of increase, the VBM moves from L point to the point between L and M.

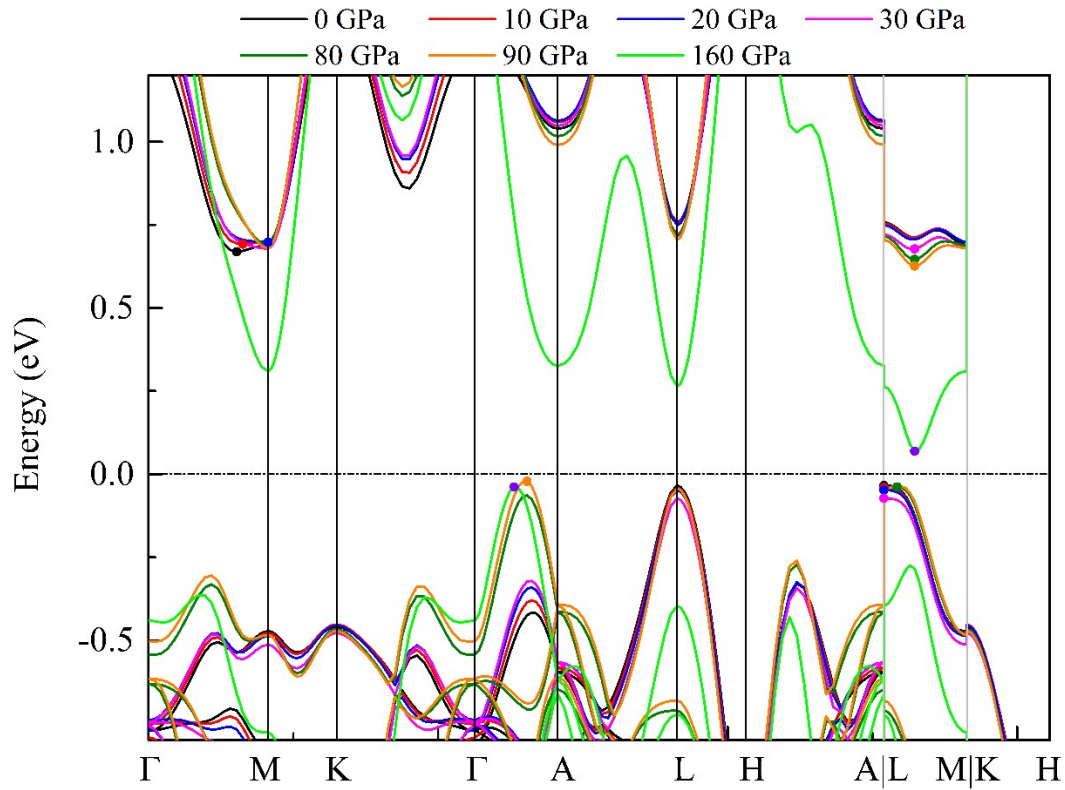

Figure S6. Band structure of  $P3_121\text{-ZrN}_2$  at ambient and high pressure. The VBM in the 0-40 GPa pressure range is at L point, and with the pressure of increase (40-80 GPa), the VBM moves from L point to the point between L and M, and then in the pressure range of 90-200 GPa, the VBM is on the line between  $\Gamma$  and A point. The CBM is between  $\Gamma$  and M point at 0-10 GPa, and at 20 GPa the CBM is at M point, but with increasing of pressure (30-200 GPa), the CBM is between L and M point.



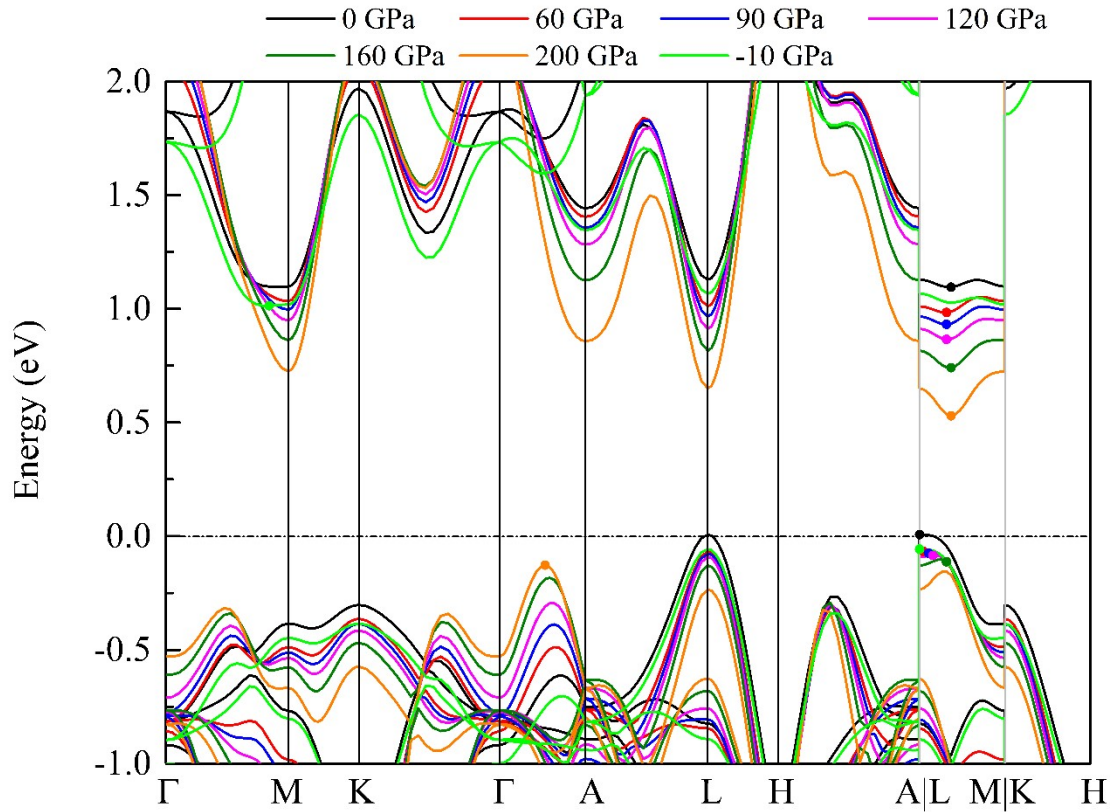

Figure S7. Band structure of  $P3_121\text{-HfN}_2$  at ambient and high pressure. The CBM is located on the line between L and M point in the pressure range of 0-200 GPa, but is located on the line between  $\Gamma$  and M point at -10 GPa (the negative sign represents the applied hydrostatic expansion pressure). It should be noted that the CBM at 0 and 160-200 GPa is on the same k-point, while the CBM at 10-140 GPa is located on the other one k-point. In the pressure range of -10-50 GPa, the VBM is at L point. With the pressure of increasing (50-180 GPa), the VBM moves from L point to the point between L and M, and then moves the point between  $\Gamma$  and A at the pressure of 200 GPa.

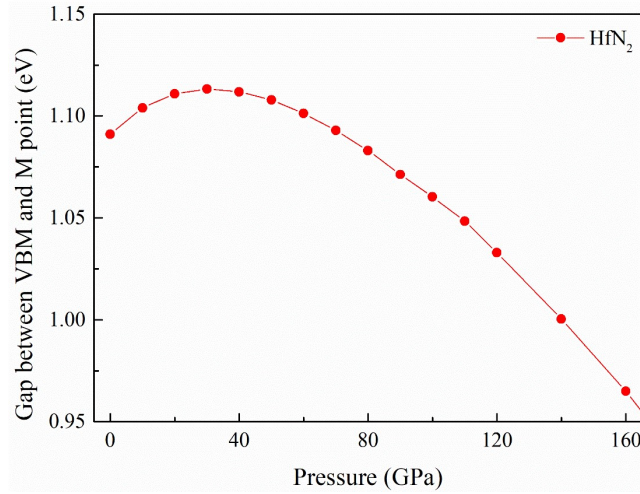

Figure S8. The energy gap between VBM and M point of conduction band for  $P3_121$ -HfN<sub>2</sub>.

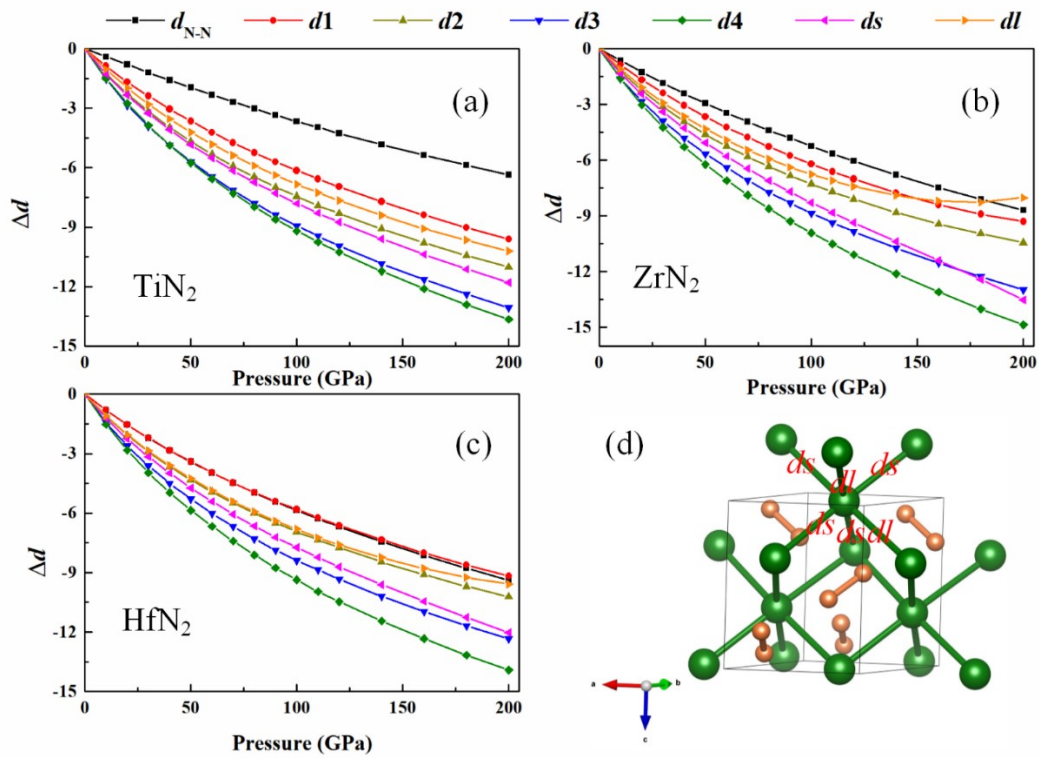

Figure S9. The variation of bond lengths of N-N, TM-N, and TM-TM bond of  $P3_121$  structure

expressed in percent ( $\Delta d = \frac{d - d_0}{d_0} * 100\%$ , where  $d_0$  and  $d$  are the bond lengths at zero and high pressure, respectively.) as a function of pressure for (a) TiN<sub>2</sub>, (b) ZrN<sub>2</sub>, and (c) HfN<sub>2</sub>. (d) Crystal structure of  $P3_121$  with the TM-TM and N-N bonds, and the  $d_s$  and  $d_l$  are the shorter and longer bond length of TM-TM bonds, respectively.

Table S3. The calculated bulk modulus B, shear modulus G, and Vickers hardness  $H_v$  (in units of GPa) for c- $Zr_3N_4$  and c- $Hf_3N_4$  at ambient pressure.

|              | B          |                     | G          |                     | $H_v$      |                     |
|--------------|------------|---------------------|------------|---------------------|------------|---------------------|
|              | This works | Theory <sup>a</sup> | This works | Theory <sup>a</sup> | This works | Theory <sup>a</sup> |
| c- $Zr_3N_4$ | 225.8      | 218.3               | 127.1      | 129.3               | 14.4       | 15.6                |
| c- $Hf_3N_4$ | 241.3      | 228.1               | 139.1      | 138.1               | 15.8       | 16.9                |

<sup>a</sup>Ref<sup>1</sup>

### Reference

1. Mattesini, M.; Ahuja, R.; Johansson, B., Cubic  $Hf_3N_4$  and  $Zr_3N_4$ : A class of hard materials. *Physical Review B* **2003**, *68* (18).
